# Supplementary material for: Effect of a Lactobacilli-Based Direct-Fed Microbial Product on Gut Microbiota and Gastrointestinal Morphological Changes
Source: MDPI journal article supplement (doi:10.3390/ani14050693), 2024-02-23
Supplement: s1 [file s1]

**Table S1.** Descriptive statistics of live weight (kg), live weight gain (kg), average daily gain (g/d), average daily feed intake (kg/d), total feed intake (kg), and feed efficiency by Experimental Group (Control – CON and Treatment -TRT).

|                                 | Study Day | Group CON     |                      |              | Group TRT     |                      |                | P value <sub>F</sub> |
|---------------------------------|-----------|---------------|----------------------|--------------|---------------|----------------------|----------------|----------------------|
|                                 |           | Mean (SD)     | Median (Q1, Q3)      | Min, Max     | Mean (SD)     | Median (Q1, Q3)      | Min, Max       |                      |
| <b>Live weight (kg)</b>         | -3        | 39.71 (6.97)  | 41.00 (35.30, 43.70) | 22.20, 53.20 | 42.16 (6.26)  | 40.90 (38.70, 45.10) | 30.60, 53.80   | 0.30                 |
|                                 | 14        | 42.73 (7.34)  | 42.00(38.2, 47.20)   | 25.00, 55.80 | 45.12 (6.37)  | 44.00 (41.85, 50.00) | 36.20, 58.00   | 0.31                 |
|                                 | 28        | 48.73 (8.79)  | 48.20 (42.55, 53.95) | 31.80, 65.20 | 52.04 (6.06)  | 51.40 (48.65, 53.70) | 42.00, 64.80   | 0.18                 |
|                                 | 42        | 57.13 (10.58) | 55.90 (49.20, 65.30) | 37.00, 73.40 | 61.38 (8.42)  | 60.40 (56.80, 66.00) | 42.400, 81.00  | 0.09                 |
|                                 | 56        | 69.18 (13.37) | 68.90 (61.40, 79.30) | 41.80, 91.60 | 75.01 (9.66)  | 74.10 (70.60, 77.80) | 53.400, 101.00 | 0.02                 |
| <b>Average daily gain (g/d)</b> | -3 to 14  | 180 (150)     | 160 (120, 260)       | -90, 520     | 170 (150)     | 180 (50, 280)        | -110, 460      | 0.96                 |
|                                 | 15 to 28  | 430 (250)     | 450 (250, 620)       | -70, 830     | 490 (190)     | 500 (370, 650)       | 130, 760       | 0.33                 |
|                                 | 29 to 42  | 600 (290)     | 690 (370, 830)       | -10, 1010    | 670 (250)     | 680 (490, 850)       | 30, 1240       | 0.34                 |
|                                 | 43 to 56  | 860 (310)     | 870 (770, 1060)      | 170, 1440    | 970 (210)     | 960 (820, 1100)      | 600, 1430      | 0.11                 |
|                                 | -3 to 56  | 500 (180)     | 520 (380, 620)       | 180, 840     | 570 (90)      | 540 (500, 610)       | 450, 820       | 0.14                 |
| <b>Total feed intake(kg)</b>    | -3 to 56  | 42.73 (17.54) | 42.84 (33.40, 51.00) | 15.56, 88.30 | 46.59 (12.19) | 45.60 (38.96, 52.40) | 26.97, 70.44   | 0.34                 |
|                                 |           |               |                      |              |               |                      |                |                      |
| <b>Feed efficiency §</b>        | -3 to 56  | 1.46 (0.49)   | 1.34 (1.18, 1.48)    | 0.84, 3.18   | 1.44 (0.33)   | 1.44 (1.19, 1.70)    | 0.90, 2.00     | 0.62                 |

Key: SD - Standard Deviation, Q1 & Q3 - First and Third Quartiles, Min - Minimum, Max - Maximum

§Average Feed intake kg : Average daily gain kg

F P values mean estimates. P values are interaction term p values derived from a mixed effects regression model of each measured outcome variable over the study period. Model fitted with calf as random effect with random intercepts and an autoregressive correlation structure for the residuals.

**Table S2.** Descriptive statistics of live weight, feed intake and body measurements of animals randomly selected from each Experimental Group (Control – CON and Treatment -TRT) for postmortem and histopathology investigation. .

| Variable                             | Group CON (n = 3) |                   |            | Group TRT (n = 3) |                   |            | P values <sup>‡</sup> |
|--------------------------------------|-------------------|-------------------|------------|-------------------|-------------------|------------|-----------------------|
|                                      | Mean (SD)         | Median (Q1, Q3)   | Min, Max   | Mean (SD)         | Median (Q1, Q3)   | Min, Max   |                       |
| Age at post-mortem (days)            | 63 (4)            | 64 (62, 65)       | 59, 66     | 62 (3)            | 61 (60, 63)       | 59, 65     | 0.66                  |
| Initial live weight (kg)             | 46 (7)            | 43 (42, 48)       | 41, 53     | 49 (5)            | 49 (47, 52)       | 44, 54     | 0.28                  |
| Live weight at post-mortem (kg)      | 77 (12)           | 73 (71, 82)       | 68, 91     | 84 (6)            | 85 (81, 87)       | 77, 89     | 0.51                  |
| Total live weight gain (kg)          | 32 (6)            | 30 (29, 34)       | 27, 38     | 35 (2)            | 36 (34, 36)       | 33, 36     | 0.51                  |
| Average daily gain (kg/d)            | 0.49 (0.86)       | 0.48 (0.47, 0.52) | 0.46, 0.58 | 0.56 (0.79)       | 0.59 (0.57, 0.57) | 0.55, 0.55 | 0.51                  |
| Total feed intake (kg) <sup>§§</sup> | 51 (19)           | 41 (39, 57)       | 38, 73     | 51 (1)            | 51 (50, 52)       | 49, 52     | 0.51                  |
| Hip Height (cm)                      | 93(2)             | 92 (91, 94)       | 91, 95     | 95 (2)            | 95 (94, 96)       | 93, 97     | 0.18                  |
| Hip Width (cm)                       | 21 (1)            | 20 (20, 21)       | 20, 22     | 22 (1)            | 22 (21, 22)       | 21, 22     | 0.28                  |
| Heart Girth (cm)                     | 103 (7)           | 105 (100, 107)    | 95, 109    | 102 (2)           | 103 (102, 104)    | 100, 104   | 0.51                  |

Key: SD - Standard Deviation, Q1 & Q3 - First and Third Quartiles, Min - Minimum, Max - Maximum

<sup>§§</sup> Feed intake from grain only.

<sup>‡</sup> P values derived from *Kruskal-Wallis* chi-squared test and were adjusted (Bonferroni) for multiple comparisons. The null hypothesis is that data distribution is homogenous. P values  $\leq 0.05$  reject the null hypothesis.

**Table S3.** Descriptive statistics of gastrointestinal tracts organs weights (g) of animals randomly selected from each Experimental group (Control – CON and Treatment -TRT) for postmortem and histopathology investigation.

| Organ                   | Group CON (n = 3) |                   |            | Group TRT (n = 3) |                   |            | P value <sup>‡</sup> |
|-------------------------|-------------------|-------------------|------------|-------------------|-------------------|------------|----------------------|
|                         | Mean (SD)         | Median (Q1, Q3)   | Min, Max   | Mean (SD)         | Median (Q1, Q3)   | Min, Max   |                      |
| Rumen pH                | 6 (0.89)          | 5.7 (5.5, 6.35)   | 5.3, 7.0   | 5.6 (0.1)         | 5.6 (5.55, 5.65)  | 5.5, 5.7   | 0.66                 |
| Weight with digesta (g) |                   |                   |            |                   |                   |            |                      |
| Rumen                   | 8403 (1443)       | 8510 (7710, 9150) | 6910, 9790 | 8370 (1164)       | 8690 (7885, 9015) | 7080, 9340 | 0.82                 |
| Abomasum                | 1620 (652)        | 1940 (1405, 1995) | 870, 2050  | 1390 (450)        | 1640 (1255, 1650) | 870, 1660  | 0.38                 |
| Omasum                  | 590 (291)         | 700 (480, 755)    | 260, 810   | 760 (221)         | 840 (675, 885)    | 510, 930   | 0.28                 |
| Reticulum               | 590 (324)         | 530 (415, 735)    | 300, 940   | 760 (243)         | 720 (630, 870)    | 540, 1020  | 0.28                 |
| Duodenum                | 33 (5)            | 30 (30, 35)       | 30, 40     | 87 (64)           | 50 (50, 105)      | 50, 160    | 0.04                 |
| Jejunum                 | 3590 (922)        | 3220 (3065, 3930) | 2910, 4640 | 4243.33 (134)     | 4300 (4195, 4320) | 4090, 4340 | 0.51                 |
| Ileum                   | 37 (15)           | 40 (30, 45)       | 20, 50     | 30 (17)           | 40 (25, 40)       | 10, 40     | 0.48                 |

|                                   |              |                   |            |            |                   |            |             |
|-----------------------------------|--------------|-------------------|------------|------------|-------------------|------------|-------------|
| <b>Caecum</b>                     | 730 (147)    | 810 (685, 815)    | 560, 820   | 607 (380)  | 730 (455, 820)    | 180, 910   | 0.83        |
| <b>Colon</b>                      | 1077 (352)   | 1030 (890, 1240)  | 750, 1450  | 1367 (279) | 1310 (1215, 1490) | 1120, 1670 | 0.28        |
| <b>Weight without digesta (g)</b> |              |                   |            |            |                   |            |             |
| <b>Rumen</b>                      | 1460 (191)   | 1560 (1400, 1570) | 1240, 1580 | 1427 (84)  | 1470 (1400, 1475) | 1330, 1480 | 0.51        |
| <b>Abomasum</b>                   | 390 (17)     | 400 (385, 400)    | 370, 400   | 450 (53)   | 430 (420, 470)    | 410, 510   | <b>0.05</b> |
| <b>Omasum</b>                     | 413.33 (146) | 460 (355, 495)    | 250, 530   | 417 (32)   | 430 (405, 435)    | 380, 440   | 0.51        |
| <b>Reticulum</b>                  | 257 (31)     | 250 (240, 270)    | 230, 290   | 357 (47)   | 340 (330, 375)    | 320, 410   | <b>0.05</b> |
| <b>Duodenum</b>                   | 33 (6)       | 30 (30, 35)       | 30, 40     | 73 (58)    | 40 (40, 90)       | 40, 140    | 0.09        |
| <b>Jejunum</b>                    | 2050 (579)   | 1930 (1735, 2305) | 1540, 2680 | 2643 (464) | 2540 (2390, 2845) | 2240, 3150 | 0.27        |
| <b>Ileum</b>                      | 33 (12)      | 40 (30, 40)       | 20, 40     | 30 (17)    | 40 (25, 40)       | 10, 40     | 0.79        |
| <b>Caecum</b>                     | 227 (49)     | 250 (210, 255)    | 170, 260   | 197 (97)   | 220 (155, 250)    | 90, 280    | 0.82        |
| <b>Colon</b>                      | 510 (132)    | 560 (460, 585)    | 360, 610   | 677 (84)   | 650 (630, 710)    | 610, 770   | 0.07        |

Key: SD - Standard Deviation, Q1 & Q3 - First and Third Quartiles, Min - Minimum, Max - Maximum

‡P values derived from *Kruskal-Wallis* chi-squared test and were adjusted (Bonferroni) for multiple comparisons. The null hypothesis is that data distribution is homogenous. P values ≤0.05 reject the null hypothesis.

**Table S4.** Descriptive statistics of gastrointestinal tracts organs lengths (mm) of animals randomly selected from each Experimental group (Control – CON and Treatment -TRT) for postmortem and histopathology investigation. .

| Organ          | Group CON (n = 3) |                      |              | Group TRT (n = 3) |                        |               | P value ‡ |
|----------------|-------------------|----------------------|--------------|-------------------|------------------------|---------------|-----------|
|                | Mean (SD)         | Median (Q1, Q3)      | Min, Max     | Mean (SD)         | Median (Q1, Q3)        | Min, Max      |           |
| <b>Jejunum</b> | 142 (70)          | 160 (112, 181)       | 65, 202      | 506 (636)         | 148 (139, 694)         | 130, 1240     | 0.51      |
| <b>Ileum</b>   | 20317 (2218)      | 21070 (19440, 21560) | 17820, 22060 | 91243 (68892)     | 121300 (66860, 130600) | 12430, 140000 | 0.51      |
| <b>Caecum</b>  | 188 (83)          | 165 (142, 222)       | 120, 280     | 151 (14)          | 155 (145, 158)         | 135, 162      | 0.28      |
| <b>Colon</b>   | 767 (225)         | 820 (670, 890)       | 520, 960     | 530 (269)         | 680 (450, 685)         | 220, 690      | 0.82      |

Key: SD - Standard Deviation, Q1 & Q3 - First and Third Quartiles, Min - Minimum, Max - Maximum

‡P values derived from *Kruskal-Wallis* chi-squared test and were adjusted (Bonferroni) for multiple comparisons. The null hypothesis is that data distribution is homogenous. P values ≤0.05 reject the null hypothesis.

**Table S5.** Descriptive statistics of organ tissue fold density<sup>€</sup> and length of animals randomly selected from each Experimental group (Control – CON and Treatment -TRT) for postmortem and histopathology investigation. .

| Variable                   | Group CON (n = 3) |                 |          | Group TRT (n = 3) |                 |          | P value <sup>‡</sup> |
|----------------------------|-------------------|-----------------|----------|-------------------|-----------------|----------|----------------------|
|                            | Mean (SD)         | Median (Q1, Q3) | Min, Max | Mean (SD)         | Median (Q1, Q3) | Min, Max |                      |
| <b>Tissue fold density</b> | 1.5 (0.5)         | 2.0 (1.0, 2.0)  | 1.0, 2.0 | 2.1 (0.8)         | 2.0 (2.0, 3.0)  | 1.0, 3.0 | 0.09                 |
| <b>Tissue fold length</b>  | 1.3 (0.5)         | 1.0 (1.0, 2.0)  | 1.0, 2.0 | 1.8 (0.8)         | 2.0 (1.0, 2.0)  | 1.0, 3.0 | 0.03                 |

Key: SD - Standard Deviation, Q1 & Q3 - First and Third Quartiles, Min - Minimum, Max – Maximum

<sup>€</sup> Fold density grading scheme used: Grade 1 = minimal findings; Grade 2 Moderate findings; Grade 3 Marked findings.

<sup>‡</sup> P values derived from *Kruskal-Wallis* chi-squared test and were adjusted (Bonferroni) for multiple comparisons. The null hypothesis is that data distribution is homogenous between the Groups. P values  $\leq 0.05$  reject the null hypothesis.

**Table S6.** Organ histopathology microscopic villi length (mm) and width (mm) histopathological measurement animals randomly selected from Control (CON) and Treatment (TRT) for postmortem and histopathology investigation. .

| Organ              | Group CON    |                   |             | Group TRT    |                   |                     | P<br>valu<br>e ‡ |
|--------------------|--------------|-------------------|-------------|--------------|-------------------|---------------------|------------------|
|                    | Mean<br>(SD) | Median<br>(Q1,Q3) | Min,<br>Max | Mean<br>(SD) | Median<br>Q3)     | (Q1,<br>Min,<br>Max |                  |
| Villi Length (mm)  |              |                   |             |              |                   |                     |                  |
| Rumen              | 1.46 (0.79)  | 1.31 (0.78,1.90)  | 0.05,3.32   | 1.69 (0.90)  | 1.54 (1.10, 2.02) | 0.11, 4.37          | 0.28             |
| Atrium             |              |                   |             |              |                   |                     |                  |
| Rumen              | 1.31 (0.39)  | 1.33 (1.04, 1.53) | 0.45, 2.17  | 1.75 (0.67)  | 1.69 (1.28, 2.27) | 0.42, 3.24          | 0.04             |
| Ventral Sac        |              |                   |             |              |                   |                     |                  |
| Rumen              | 1.59 (1.02)  | 1.28 (0.76, 1.98) | 0.51, 4.27  | 1.35(0.77)   | 1.33 (0.64, 1.89) | 0.04, 4.44          | 0.23             |
| Blind Sac          |              |                   |             |              |                   |                     |                  |
| Omasum             | 4.25 (4.59)  | 1.85 (1.28, 4.83) | 0.81,17.36  | 6.33(9.52)   | 1.84 (0.80, 8.62) | 0.12,40.73          | 0.28             |
| Reticulum          | 3.04 (2.35)  | 3.34 (0.85, 4.28) | 0.43,9.15   | 2.29 (1.89)  | 1.60 (0.84, 3.21) | 0.44, 7.55          | 0.32             |
| Duodenu            | 0.66 (0.22)  | 0.57 (0.47,0.84)  | 0.38, 1.13  | 0.75 (0.28)  | 0.66 (0.57,0.90)  | 0.12, 1.43          | 0.23             |
| m                  |              |                   |             |              |                   |                     |                  |
| Jejunum - Proximal | 0.86 (0.28)  | 0.80 (0.72, 0.98) | 0.46, 1.79  | 1.16 (0.50)  | 1.26 (0.67,1.50)  | 0.31, 2.18          | 0.32             |
| Jejunum - Middle   | 1.32 (0.35)  | 1.37 (0.98, 1.63) | 0.65, 1.89  | 0.87 (0.22)  | 0.84 (0.72, 0.94) | 0.34, 1.61          | 0.03             |
| Jejunum - Distal   | 0.71 (0.18)  | 0.73 (0.64,0.84)  | 0.33, 1.12  | 0.83 (0.21)  | 0.85 (0.73, 0.99) | 0.09, 1.44          | 0.13             |
| Ileum              | 0.62 (0.12)  | 0.60 (0.55, 0.67) | 0.33, 1.10  | 0.80 (0.18)  | 0.80 (0.72, 0.91) | 0.05, 1.13          | 0.00             |
| Colon              | 0.47 (0.06)  | 0.48 (0.45, 0.52) | 0.27, 0.56  | 0.52 (0.11)  | 0.50 (0.46, 0.60) | 0.33, 0.75          | 0.48             |
| Caecum             | 0.51 (0.10)  | 0.52 (0.41, 0.58) | 0.29, 0.78  | 0.53 (0.14)  | 0.49 (0.43, 0.63) | 0.28, 0.82          | 0.38             |
| Abomasu            | 0.55 (0.32)  | 0.44 (0.34, 0.60) | 0.20, 1.40  | 0.59 (0.21)  | 0.49 (0.43, 0.72) | 0.36, 1.08          | 0.36             |
| m                  |              |                   |             |              |                   |                     |                  |
| Villi Width (mm)   |              |                   |             |              |                   |                     |                  |
| Rumen              | 0.28 (0.07)  | 0.28 (0.22,0.32)  | 0.17, 0.47  | 0.37 (0.27)  | 0.31 (0.13, 0.57) | 0.05, 0.98          | 0.31             |
| Atrium             |              |                   |             |              |                   |                     |                  |
| Rumen              | 0.22 (0.11)  | 0.23 (0.14,0.29)  | 0.02, 0.54  | 0.37 (0.12)  | 0.37 (0.26, 0.46) | 0.15, 0.62          | 0.06             |
| Ventral Sac        |              |                   |             |              |                   |                     |                  |
| Rumen              | 0.24 (0.14)  | 0.20 (0.16, 0.30) | 0.07, 0.78  | 0.34 (0.15)  | 0.31 (0.23, 0.43) | 0.07, 0.70          | 0.23             |
| Blind Sac          |              |                   |             |              |                   |                     |                  |
| Omasum             | 0.66 (0.18)  | 0.68 (0.53,0.79)  | 0.11, 1.02  | 0.42, (0.14) | 0.40 (0.34, 0.47) | 0.13, 1.01          | 0.02             |
| Reticulum          | 0.43 (0.18)  | 0.35 (0.29, 0.59) | 0.17, 0.85  | 0.43 (0.29)  | 0.34 (0.19, 0.57) | 0.10, 1.45          | 0.23             |
| Duodenu            | 0.05 (0.01)  | 0.05 (0.04, 0.06) | 0.02, 0.08  | 0.06 (0.0)   | 0.05 (0.04, 0.08) | 0.02, 0.12          | 0.17             |
| m                  |              |                   |             |              |                   |                     |                  |
| Jejunum - Proximal | 0.05 (0.02)  | 0.05 (0.04, 0.06) | 0.03, 0.10  | 0.08 (0.12)  | 0.06 (0.05, 0.07) | 0.03, 0.82          | 0.37             |
| Jejunum - Middle   | 0.04 (0.01)  | 0.04 (0.03, 0.05) | 0.01, 0.08  | 0.51 (0.65)  | 0.09 (0.06, 1.19) | 0.04, 1.97          | 0.20             |

|                  |                    |                          |                   |                    |                          |                   |             |
|------------------|--------------------|--------------------------|-------------------|--------------------|--------------------------|-------------------|-------------|
| Jejunum - Distal | 0.06 (0.03)        | 0.06 (0.04, 0.08)        | 0.02, 0.18        | 0.07 (0.10)        | 0.06 (0.05, 0.07)        | 0.03, 0.83        | 0.38        |
| <b>Ileum</b>     | 0.10 (0.15)        | 0.07 (0.05, 0.10)        | 0.03, 0.90        | 0.08 (0.05)        | 0.06 (0.05, 0.10)        | 0.03, 0.25        | 0.45        |
| <b>Colon</b>     | <b>0.07 (0.07)</b> | <b>0.06 (0.04, 0.07)</b> | <b>0.02, 0.55</b> | <b>0.09 (0.10)</b> | <b>0.08 (0.06, 0.09)</b> | <b>0.03, 0.83</b> | <b>0.02</b> |
| <b>Caecum</b>    | <b>0.05 (0.02)</b> | <b>0.05 (0.04, 0.07)</b> | <b>0.03, 0.09</b> | <b>0.07 (0.02)</b> | <b>0.07 (0.05, 0.08)</b> | <b>0.03, 0.11</b> | <b>0.07</b> |

‡ P values derived from *Kruskal-Wallis* chi-squared test and were adjusted (Bonferroni) for multiple comparisons. The null hypothesis is that data distribution is homogenous between the Groups. P values  $\leq 0.05$  reject the null hypothesis.

**Table S7.** Organ histopathology microscopic villi surface area ( $\mu\text{m}$ ) of animals randomly selected from each Experimental group (Control – CON and Treatment -TRT) for postmortem and histopathology investigation. .

| Organs                  | Group CON   |                    |             | Group TRT   |                   |             | P values ‡ |
|-------------------------|-------------|--------------------|-------------|-------------|-------------------|-------------|------------|
|                         | Mean (SD)   | Median (Q1,Q3)     | Min ,Max    | Mean(SD )   | Median (Q1,Q3)    | Min ,Max    |            |
| Villi surface area (µm) |             |                    |             |             |                   |             |            |
| Rumen atrium            | 0.81 (0.71) | 0.52 (0.35, 1.04)  | 0.17, 3.53  | 0.95 (1.07) | 0.59 (0.37, 1.02) | 0.10, 6.57  | 0.23       |
| Rumen ventral Sac       | 0.54 (0.49) | 0.39 (0.22, 0.66)  | 0.11, 2.63  | 0.94 (0.82) | 0.70 (0.45, 1.24) | 0.15, 4.19  | 0.12       |
| Rumen blind Sac         | 1.21 (0.94) | 1.01 (0.38, 1.79)  | 0.11, 3.27  | 0.67 (0.64) | 0.44 (0.32, 0.74) | 0.10, 3.32  | 0.18       |
| Omasum                  | 8.13 (7.25) | 4.62 (3.02, 11.49) | 0.49, 35.64 | 6.85 (6.12) | 5.15 (2.05, 8.90) | 0.04, 24.02 | 0.26       |
| Reticulum               | 1.90 (2.39) | 0.83 (0.33, 2.15)  | 0.11, 9.12  | 1.93 (1.99) | 1.32 (0.64, 2.95) | 0.11, 13.64 | 0.26       |
| Duodenum                | 0.38 (0.13) | 0.39 (0.29, 0.45)  | 0.12, 0.68  | 0.50 (0.21) | 0.47 (0.36, 0.69) | 0.10, 0.87  | 0.08       |
| Jejunum - proximal      | 0.53 (0.21) | 0.50 (0.36, 0.74)  | 0.10, 0.98  | 0.48 (0.22) | 0.43 (0.33, 0.60) | 0.05, 0.98  | 0.33       |
| Jejunum - middle        | 0.50 (0.21) | 0.50 (0.32, 0.62)  | 0.14, 0.94  | 0.42 (0.17) | 0.40 (0.33, 0.50) | 0.13, 0.97  | 0.09       |
| Jejunum - distal        | 0.40 (0.22) | 0.43 (0.19,0.58)   | 0.10,0.95   | 0.55 (0.24) | 0.55 (0.37, 0.71) | 0.10, 1.09  | 0.29       |
| Ileum                   | 0.49 (0.20) | 0.54 (0.40, 0.60)  | 0.11, 0.88  | 0.48 (0.20) | 0.44 (0.35, 0.63) | 0.11, 0.93  | 0.28       |
| Colon                   | 0.29 (0.14) | 0.27 (0.22, 0.32)  | 0.13, 0.96  | 0.32 (0.15) | 0.29 (0.21, 0.39) | 0.12, 0.95  | 0.35       |
| Caecum                  | 0.34 (0.16) | 0.32 (0.24, 0.40)  | 0.11, 0.95  | 0.37 (0.15) | 0.35 (0.25, 0.46) | 0.17, 0.78  | 0.15       |
| Abomasum                | 0.32 (0.11) | 0.28 (0.25, 0.36)  | 0.18, 0.67  | 0.37 (0.17) | 0.31 (0.23, 0.49) | 0.12, 0.84  | 0.25       |

‡ P values derived from *Kruskal-Wallis* chi-squared test and were adjusted (Bonferroni) for multiple comparisons. The null hypothesis is that data distribution is homogenous between the Groups. P values  $\leq 0.05$  reject the null hypothesis.

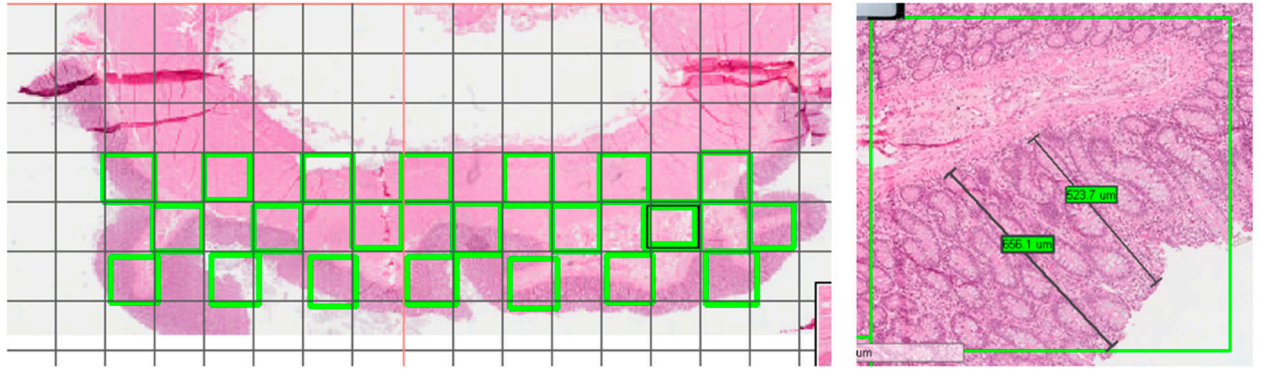

**Figure S1.** An example of area selection for linear measurement forestomach (reticulum, rumen, omasum). The linear measurements were obtained through measurement of all intact villi as shown in Figure S2

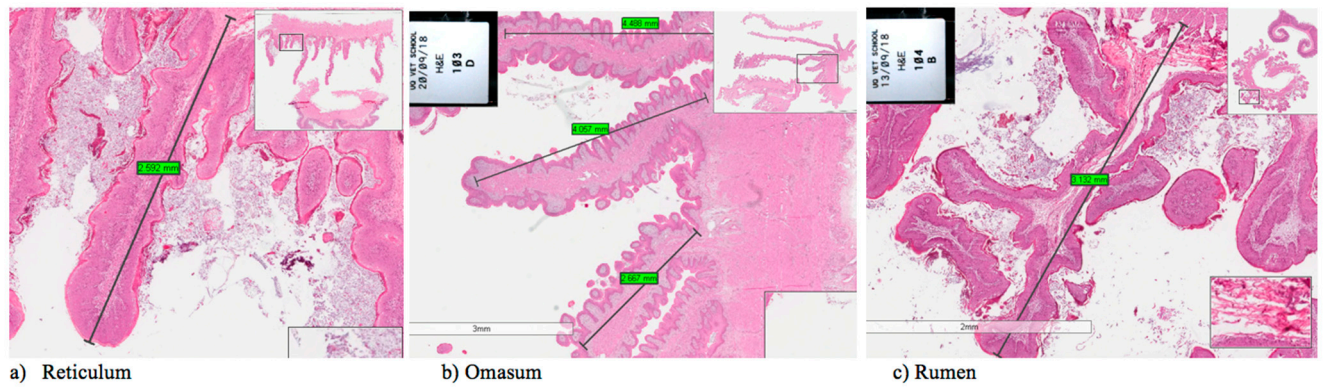

**Figure S2.** Linear measurements of forestomach example.
